# Supplementary material for: Laryngitis in children
Source: Hindawi journal article supplement (doi:10.1155/2021/8546739), 2006-10-05
Supplement: f1 [file 8546739.f1.pdf]

## Supplementary Materials1

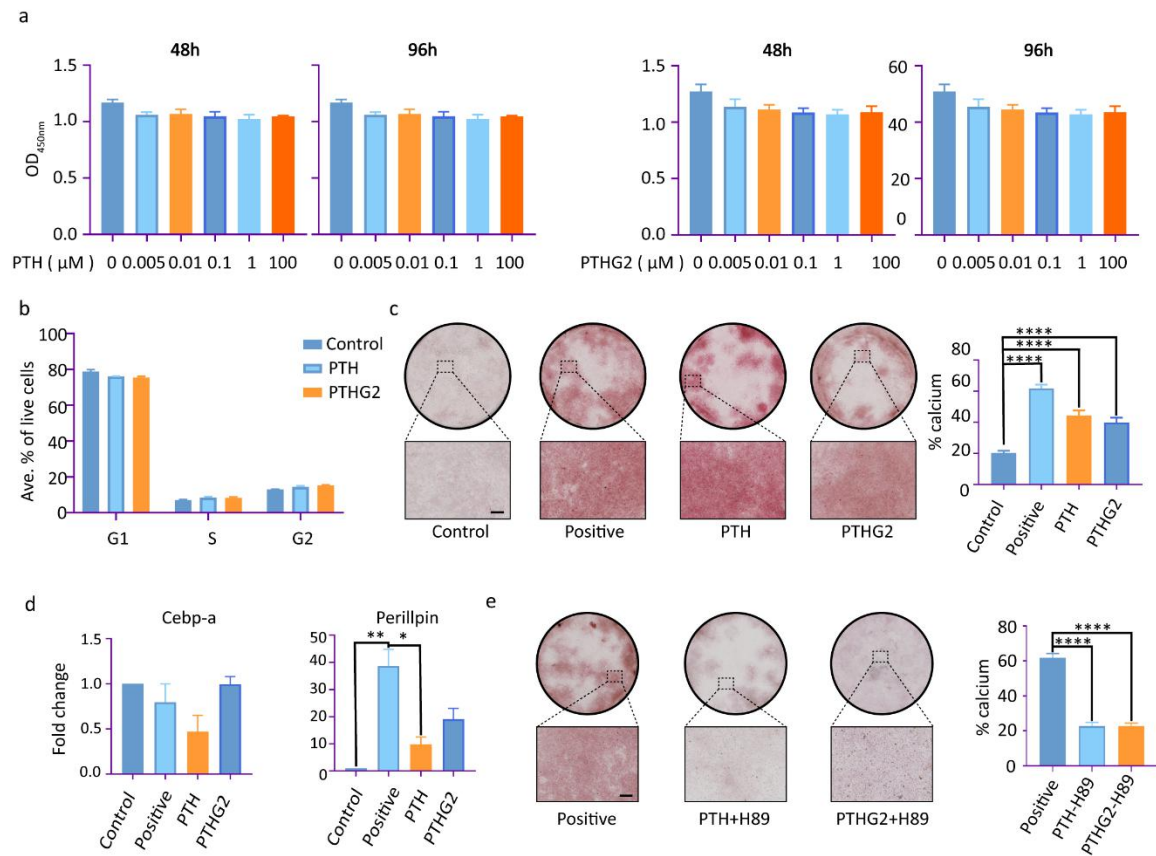

Supplementary material 1: PTHG2 did not affect the proliferation of BMSCs and promoted the osteogenic differentiation of BMSCs and inhibited the differentiation into adipocytes. a) BMSC cell viability as assessed by CCK-8 assay following treatment without or with indicated concentrations of PTHG2 for 48 and 96h. b) The cell cycle is analyzed with PI staining. c) Alizarin red staining of osteogenic differentiation with PTH (1-34) or PTHG2 and quantify. d) The relative expression of Cebp- $\alpha$  and Perilipin following PTHG2 treatment were quantified by real time PCR. e) After pretreatment with H89, BMSC differentiated and stained with Alizarin red for 21 days. Data presented as mean  $\pm$  standard deviation (n=3). Scale bar, 30 $\mu$ m;

\*p<0.05, \*\*p<0.01, \*\*\*p<0.001, \*\*\*\*p<0.001.

## Supplementary Materials2

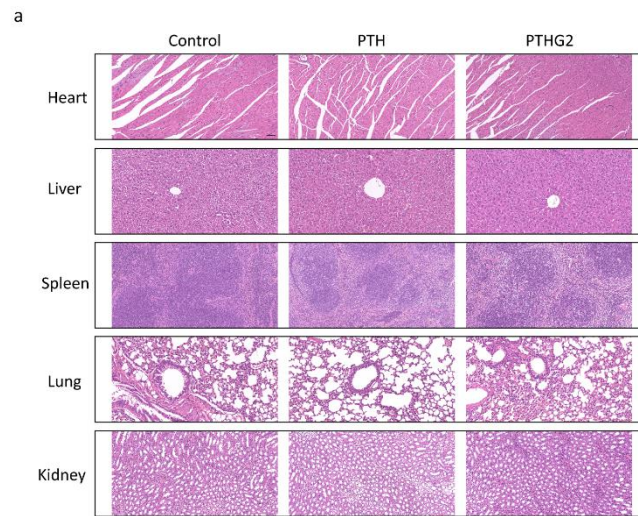

Supplementary material 2: H&E staining of the heart, liver, spleen, lung and kidney after administration of Normal saline, PTH, PTHG2, Scale bar, 50 $\mu$ m.
